# Supplementary material for: Trends in Rheumatic Heart Disease Mortality in the United States of America from 1968 to 2023: A Nationwide Analysis
Source: Research Square preprint supplement (doi:10.21203/rs.3.rs-8237353/v1), 2025-12-08
Supplement: Supplementary file 1 [file 08bf13ae75e9bf2a72a2d4bb.docx]

**Supplementary** F**igure 1.** Crude rheumatic heart disease mortality rate per 100,000 by sex, in the United States of America (1968–2023).


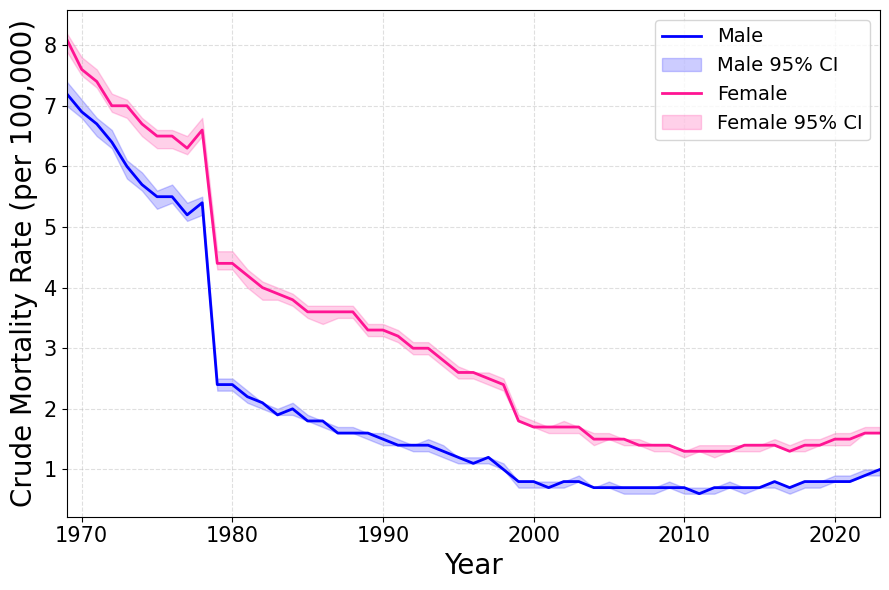


**Supplementary Figure 2.** Age-specific distribution RHD mortality in the United States across three representative years: 1970, 2000, and 2023.


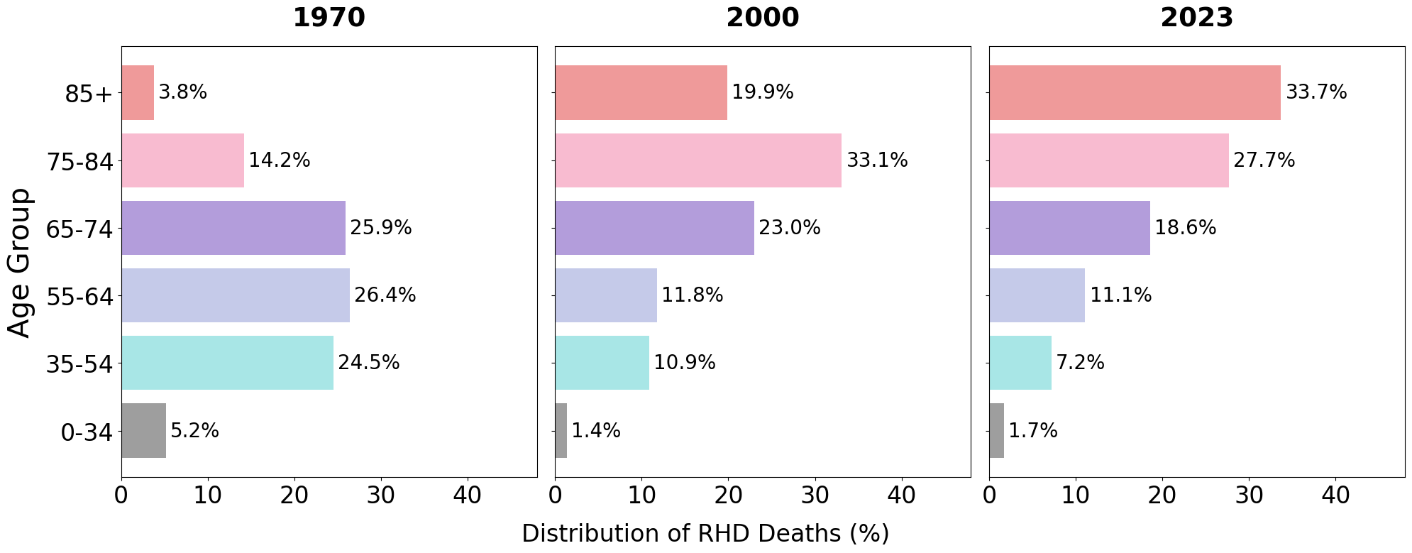


**
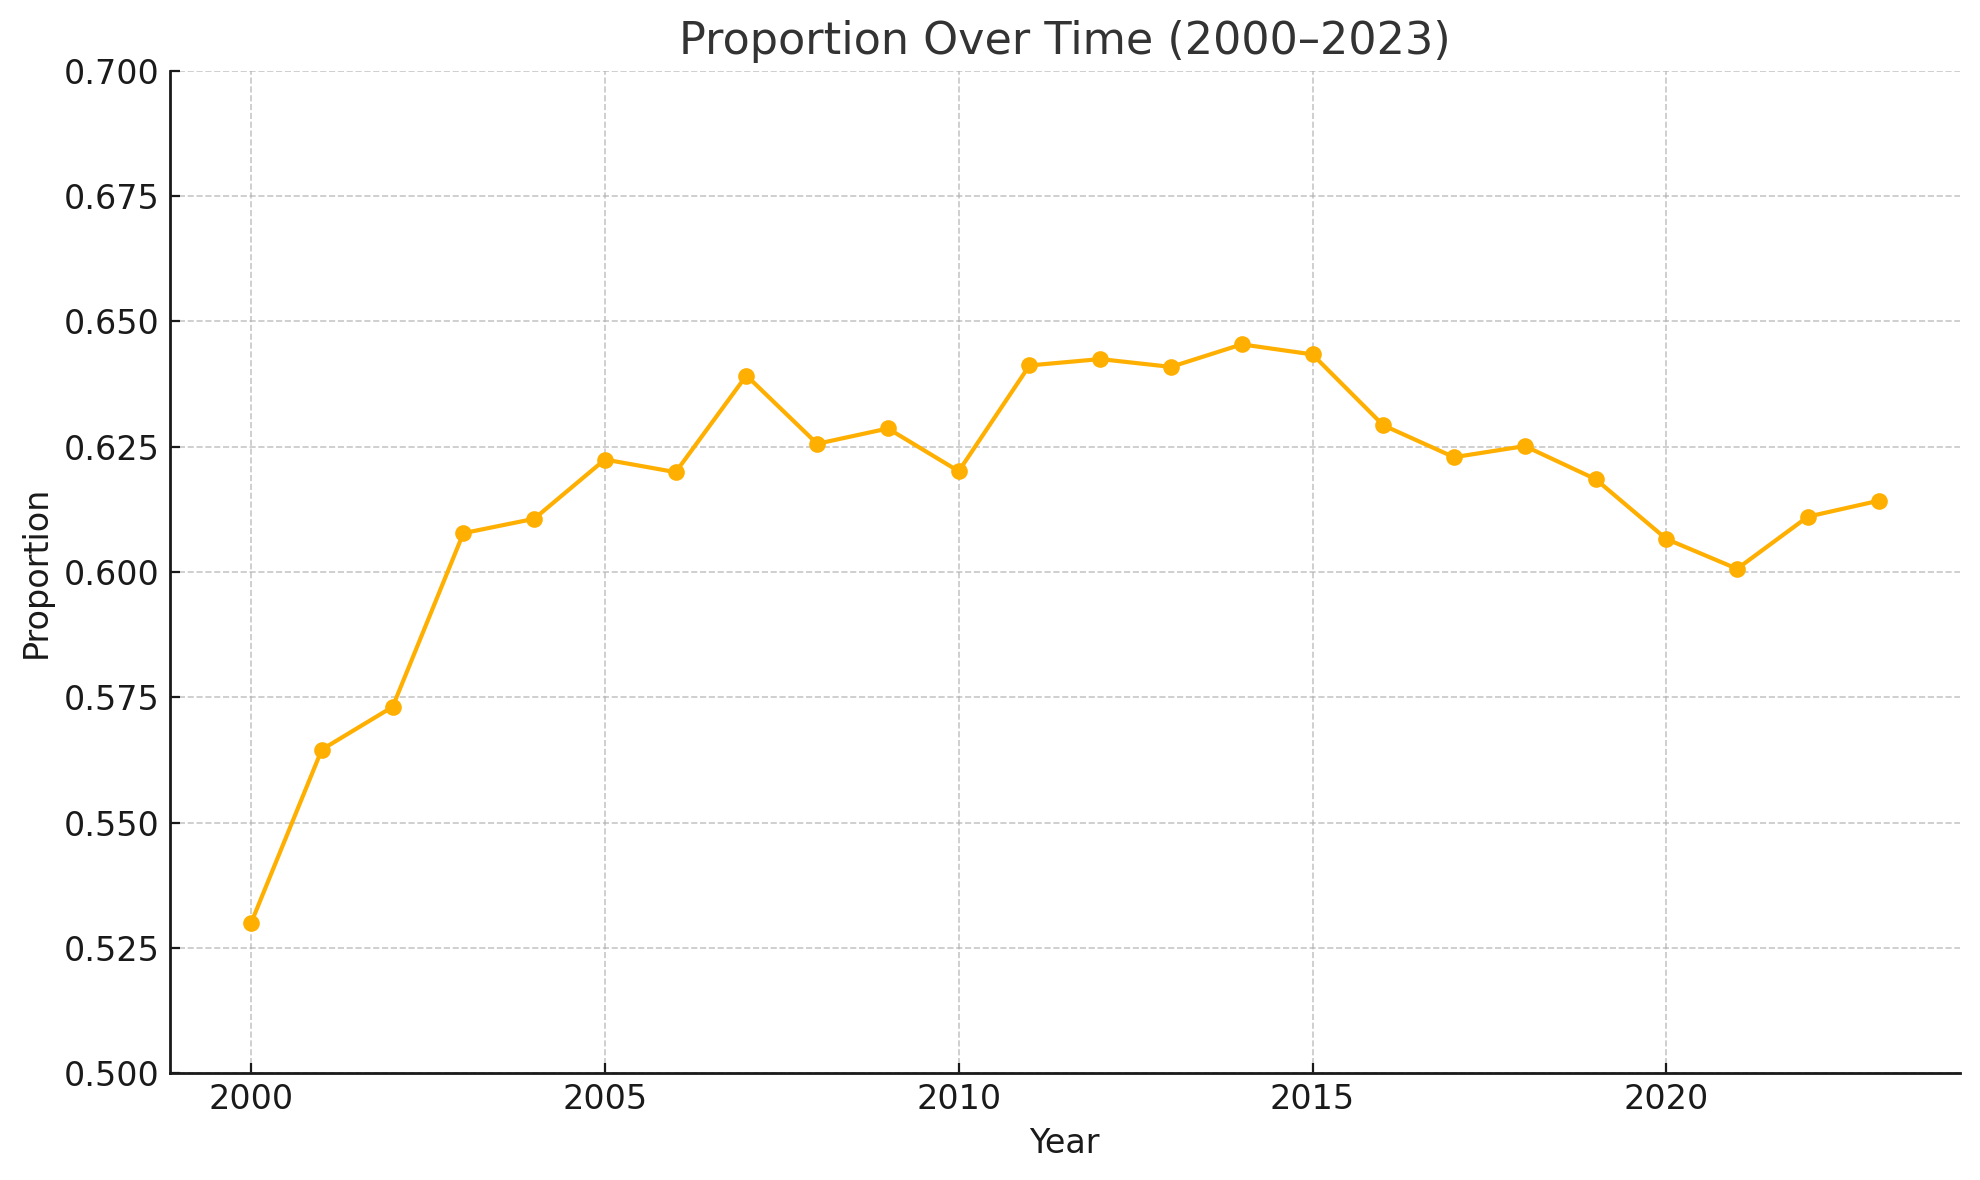
Supplementary Figure 3.** Percentage of RHD-related deaths occurring in individuals aged ≥75 years, 2000–2023.

**Supplementary Table 1.** STROBE Statement—checklist of items that should be included in reports of observational studies

|  | Item No. | Recommendation | Page No. | Line No. |
| --- | --- | --- | --- | --- |
| **Title and abstract** | 1 | (*a*) Indicate the study’s design with a commonly used term in the title or the abstract | 1 | 1-2 |
| (*b*) Provide in the abstract an informative and balanced summary of what was done and what was found | 3-4 | 43-71 |
| Introduction | | | |  |
| Background/rationale | 2 | Explain the scientific background and rationale for the investigation being reported | 5-6 | 72-100 |
| Objectives | 3 | State specific objectives, including any prespecified hypotheses | 6 | 96-100 |
| Methods | | | |  |
| Study design | 4 | Present key elements of study design early in the paper | 6 | 104-107 |
| Setting | 5 | Describe the setting, locations, and relevant dates, including periods of recruitment, exposure, follow-up, and data collection | 6 | 104-118 |
| Participants | 6 | (*a*) *Cohort study*—Give the eligibility criteria, and the sources and methods of selection of participants. Describe methods of follow-up  *Case-control study*—Give the eligibility criteria, and the sources and methods of case ascertainment and control selection. Give the rationale for the choice of cases and controls  *Cross-sectional study*—Give the eligibility criteria, and the sources and methods of selection of participants | 6-8 (Study is a retrospective population-based time-trend study) | N/A  120-140 |
| (*b*)*Cohort study*—For matched studies, give matching criteria and number of exposed and unexposed  *Case-control study*—For matched studies, give matching criteria and the number of controls per case | N/A | N/A |
| Variables | 7 | Clearly define all outcomes, exposures, predictors, potential confounders, and effect modifiers. Give diagnostic criteria, if applicable | 6-8 | 109-118 |
| Data sources/ measurement | 8* | For each variable of interest, give sources of data and details of methods of assessment (measurement). Describe comparability of assessment methods if there is more than one group | 6-7 | 102-130 |
| Bias | 9 | Describe any efforts to address potential sources of bias | N/A | N/A |
| Study size | 10 | Explain how the study size was arrived at | 7 | 132-140 |

Continued on next page

| Quantitative variables | 11 | Explain how quantitative variables were handled in the analyses. If applicable, describe which groupings were chosen and why | 7-8 | 142-154 |
| --- | --- | --- | --- | --- |
| Statistical methods | 12 | (*a*) Describe all statistical methods, including those used to control for confounding | 7-8 | 142-154 |
| (*b*) Describe any methods used to examine subgroups and interactions | 7-8 | 142-154 |
| (*c*) Explain how missing data were addressed | 7-8 | 142-154 |
| (*d*) *Cohort study*—If applicable, explain how loss to follow-up was addressed  *Case-control study*—If applicable, explain how matching of cases and controls was addressed  *Cross-sectional study*—If applicable, describe analytical methods taking account of sampling strategy | N/A | N/A |
| (*e*) Describe any sensitivity analyses | N/A | N/A |
| Results | | | | |
| Participants | 13* | (a) Report numbers of individuals at each stage of study—eg numbers potentially eligible, examined for eligibility, confirmed eligible, included in the study, completing follow-up, and analysed | 8 | 156 |
| (b) Give reasons for non-participation at each stage | No non-participants in this study |  |
| (c) Consider use of a flow diagram | N/A | N/A |
| Descriptive data | 14* | (a) Give characteristics of study participants (eg demographic, clinical, social) and information on exposures and potential confounders | 9 | 160-181 |
| (b) Indicate number of participants with missing data for each variable of interest | N/A | N/A |
| (c) *Cohort study*—Summarise follow-up time (eg, average and total amount) |  |  |
| Outcome data | 15* | *Cohort study*—Report numbers of outcome events or summary measures over time | Adapted for the study  8-9 | 160-181 |
| *Case-control study—*Report numbers in each exposure category, or summary measures of exposure |
| *Cross-sectional study—*Report numbers of outcome events or summary measures |
| Main results | 16 | (*a*) Give unadjusted estimates and, if applicable, confounder-adjusted estimates and their precision (eg, 95% confidence interval). Make clear which confounders were adjusted for and why they were included | N/A | N/A |
| (*b*) Report category boundaries when continuous variables were categorized | No category boundaries were relevant for this study | N/A |
| (*c*) If relevant, consider translating estimates of relative risk into absolute risk for a meaningful time period | N/A | N/A |

Continued on next page

| Other analyses | 17 | Report other analyses done—eg analyses of subgroups and interactions, and sensitivity analyses | N/A | N/A |
| --- | --- | --- | --- | --- |
| Discussion | | | | |
| Key results | 18 | Summarise key results with reference to study objectives | 15 | 249-255 |
| Limitations | 19 | Discuss limitations of the study, taking into account sources of potential bias or imprecision. Discuss both direction and magnitude of any potential bias | 18 | 320-333 |
| Interpretation | 20 | Give a cautious overall interpretation of results considering objectives, limitations, multiplicity of analyses, results from similar studies, and other relevant evidence | 18 | 336-339 |
| Generalisability | 21 | Discuss the generalisability (external validity) of the study results | N/A | N/A |
| Other information | |  | | |
| Funding | 22 | Give the source of funding and the role of the funders for the present study and, if applicable, for the original study on which the present article is based | 2 | 28 |

**Supplementary Table 2.** The Reporting of studies Conducted using Observational Routinely-collected health Data (RECORD) Statement, extended from the STROBE statement, that should be reported in observational studies using routinely collected health data.

| **RECORD items** | **Location in manuscript where items are reported** |
| --- | --- |
| **Title and abstract** | |
| RECORD 1.1: The type of data used should be specified in the title or abstract. When possible, the name of the databases used should be included. | 1.1: Lines 1-2  1.2: Lines 1-2  1.3: N/A |
|  |
| RECORD 1.2: If applicable, the geographic region and timeframe within which the study took place should be reported in the title or abstract. |
|  |
| RECORD 1.3: If linkage between databases was conducted for the study, this should be clearly stated in the title or abstract. |
| **Methods** | |
| RECORD 6.1: The methods of study population selection (such as codes or algorithms used to identify subjects) should be listed in detail. If this is not possible, an explanation should be provided. | 6.1: Lines 103-141  6.2: N/A  6.3 N/A – study no linkage |
|  |
| RECORD 6.2: Any validation studies of the codes or algorithms used to select the population should be referenced. If validation was conducted for this study and not published elsewhere, detailed methods and results should be provided. |
|  |
| RECORD 6.3: If the study involved linkage of databases, consider use of a flow diagram or other graphical display to demonstrate the data linkage process, including the number of individuals with linked data at each stage. |
| RECORD 7.1: A complete list of codes and algorithms used to classify exposures, outcomes, confounders, and effect modifiers should be provided. If these cannot be reported, an explanation should be provided. | 7.1: Lines 109-140 |
| RECORD 12.1: Authors should describe the extent to which the investigators had access to the database population used to create the study population. | 12.1: Lines 109-118, database is publicly available |
|  |
| RECORD 12.2: Authors should provide information on the data cleaning methods used in the study. |
| RECORD 12.3: State whether the study included person-level, institutional-level, or other data linkage across two or more databases. The methods of linkage and methods of linkage quality evaluation should be provided. | 12.3: Lines 109-118 |
| **Results** | |
| RECORD 13.1: Describe in detail the selection of the persons included in the study (*i.e.,* study population selection) including filtering based on data quality, data availability and linkage. The selection of included persons can be described in the text and/or by means of the study flow diagram. | 13.1: Lines 110-159 |
| **Discussion** | |
| RECORD 19.1: Discuss the implications of using data that were not created or collected to answer the specific research question(s). Include discussion of misclassification bias, unmeasured confounding, missing data, and changing eligibility over time, as they pertain to the study being reported. | 19.1: Lines 327-333 |
| **Other Information** | |
| RECORD 22.1: Authors should provide information on how to access any supplemental information such as the study protocol, raw data, or programming code. | 20.1: Lines 38-39 |

| Variables | Beta | p-value |
| --- | --- | --- |
| Crude Rate | -5.5 | P<0.0001 |
| Male CMR | -24.7 | P<0.0001 |
| Female CMR | -13.7 | P<0.0001 |
| Black/ African American | -0.03 | P<0.0001 |
| Hispanic | 0.02 | P=0.799 |
| White | -0.003 | P<0.0001 |
| American Indian | 0.07 | P=0.866 |
| Asian / Pacific Islander | 0.24 | P=0.013 |
| <35 | -0.05 | P<0.0001 |
| 35-54 | -0.01 | P<0.0001 |
| 55-74 | -0.005 | P<0.0001 |
| 75-84 | -0.02 | P<0.0001 |
| >85 | 0.05 | P<0.0001 |
| Large Central Metro | -0.04 | P<0.0001 |
| Noncore nonmetro | -0.08 | P=0.048 |

**Supplementary Table 3.** Univariate linear regression results identifying independent predictors of annual change in RHD crude mortality rate (1968-2012) using backward stepwise selection

| Variables | Beta | p**-**value |
| --- | --- | --- |
| CMR | 26.4 | P<0.0001 |
| Male CMR | 30.3 | P=0.001 |
| Female CMR | 27.5 | P=0.001 |
| Black / African American | 0.06 | P<0.0001 |
| Hispanic | 0.07 | P<0.0001 |
| White | 0.01 | P<0.0001 |
| American Indian | 0.36 | P=0.012 |
| Asian / Pacific Islander | 0.111 | P=0.011 |
| <35 | 0.13 | P=0.019 |
| 35-54 | 0.08 | P<0.0001 |
| 55-74 | 0.02 | P<0.0001 |
| 75-84 | 0.02 | P=0.002 |
| >85 | 0.03 | P<0.0001 |
| Large Central Metro | 0.03 | P<0.0001 |
| Noncore nonmetro | 0.1 | P=0.01 |

**Supplementary Table 5.** Univariate linear regression results identifying independent predictors of annual change in RHD crude mortality rate (2013-2023) using backward stepwise selection.

| **Category** | **Subgroup** | **Average raw increase per year** | **Annual raw % increase per year** | **Average CMR increase per year** | | **Annual CMR % Yearly Increase** | |
| --- | --- | --- | --- | --- | --- | --- | --- |
| Overall |  | 105.6 | 3.14% | |  | |  |
| Demographics | Male | 46.3 | 3.63% | | 3.4 | | 4.29% |
|  | Female | 60.3 | 2.16% | | 2.1 | | 2.71% |
| Age Groups | 0–34 | 3.9 | 8.24% | | 8.24 | | 9.62% |
|  | 35–54 | 11.5 | 4.38% | | 4.38 | | 4.38% |
|  | 55–64 | 15.0 | 3.49% | | 3.49 | | 4.22% |
|  | 65–74 | 22.0 | 0.34% | | 0.34 | | 3.74% |
|  | 75–84 | 26.5 | -0.33% | | -0.33 | | 2.73% |
|  | 85+ | 36.4 | 2.62% | | 2.62 | | 3.04% |
| Race | American Indian or Alaskan Native | 2.0 | 9.69% | | 9.69 | | 10.13% |
|  | Asian or Pacific Islander | 6.0 | 4.62% | | 4.62 | | 5.39% |
|  | Black or African American | 7.4 | 5.06% | | 5.06 | | 5.55% |
|  | White | 41.0 | 2.68% | | 2.68 | | 2.81% |
| Ethnicity | Hispanic | 6.2 | 4.91% | | 4.91 | | 6.91% |
|  | Not Hispanic | 34.8 | 2.70% | | 2.70 | | 3.01% |
| Urbanisation | Large Central Metro | 20.2 | 2.04% | | 2.04 | | 2.56% |
|  | Large Fringe Metro | 24.6 | 2.71% | | 2.71 | | 3.67% |
|  | Medium Metro | 34.8 | 3.62% | | 3.62 | | 4.37% |
|  | Small Metro | 14.0 | 3.87% | | 3.87 | | 4.35% |
|  | Micropolitan (Nonmetro) | 11.9 | 3.41% | | 3.41 | | 3.51% |
|  | NonCore (Nonmetro) | 1.9 | 1.27% | | 1.27 | | 1.02% |

**Supplementary Table 4.** Average annual percentage increase in raw and crude mortality rates for rheumatic heart disease by demographic subgroup, 2013-2023

CMR: Crude mortality rate
